# Supplementary material
Source: publisher figshare collection journal article supplement (https://acs.figshare.com/ndownloader/files/16770224)
Supplement: Supplementary file 1 [file 16770224]

## **Supporting Information**

**For**

### **Experimental study on the selective removal of SO<sub>2</sub> from a ship exhaust gas stream using a membrane contactor**

Hyung Jin Park<sup>a, c</sup>, Umair Hassan Bhatti<sup>a, b</sup>, Sang Hyun Joo<sup>a, c</sup>, Sung Chan Nam<sup>a</sup>, Sung Yeol Park<sup>a</sup>, Ki  
Bong Lee<sup>c, \*</sup>, Il Hyun Baek<sup>a, \*</sup>

<sup>a</sup> Greenhouse Gas Laboratory, Korea Institute of Energy Research, 34129, Daejeon, Republic of Korea

<sup>b</sup> University of Science and Technology, Daejeon, 34113, Republic of Korea

<sup>c</sup> Department of Chemical & Biological Engineering, Korea University, Seoul, 02 Republic of Korea

#### **\*Corresponding authors:**

Ki Bong Lee: E-mail: [kibonglee@korea.ac.kr](mailto:kibonglee@korea.ac.kr)

Il Hyun Baek: E-mail: [ihbaek@kier.re.kr](mailto:ihbaek@kier.re.kr)

#### **Supporting Information contents:**

Number of pages: 6

Number of figures: 2

Number of tables: 2

## Investigating the membrane pore blockage issue: solubility of NaOH and Na<sub>2</sub>SO<sub>3</sub> in water

The aqueous solutions of NaOH and Na<sub>2</sub>SO<sub>3</sub> reacts with SO<sub>2</sub> to form salts having high solubility in water, so that there is no problem of precipitation in the membrane pore. Table S1 provides a solubility table for the absorbents and their reaction products used in the SO<sub>2</sub> removal experiments.

The amounts of “Na” in the absorbent can be calculated using Equations 1 and 2.

$$\frac{0.2mol}{1L}NaOH \times \frac{1molNa_2SO_3}{2molNaOH} \times \frac{126g}{1mol}Na_2SO_3 = 12.6\frac{g}{L}Na_2SO_3 \quad (1)$$

$$\frac{0.2mol}{1L}Na_2SO_3 \times \frac{2molNaHSO_3}{1molNa_2SO_3} \times \frac{104g}{1mol}NaHSO_3 = 41.6\frac{g}{L}NaHSO_3 \quad (2)$$

The solubility of Na<sub>2</sub>SO<sub>3</sub> in the water at 20 °C is 270g/L. However, the amount of the Na<sub>2</sub>SO<sub>3</sub> formed is just 12.6 g/L that is almost 21 times lower than the solubility value. The solubility of NaHSO<sub>3</sub> in the water at 20 °C is 420g/L. However, the amount of the NaHSO<sub>3</sub> formed is just 41.6 g/L that is almost 28 times lower than the solubility value. This means that the formed Na<sub>2</sub>SO<sub>3</sub> and NaHSO<sub>3</sub> will easily dissolve into the water and there will not be any solid salt in the membrane to deposit or clog the pores.

| Absorbents & Products                            | Solubility |          |          |
|--------------------------------------------------|------------|----------|----------|
|                                                  | 0°C        | 20°C     | 100°C    |
| NaOH (Sodium hydroxide)                          | 418 g/L    | 1110 g/L | 3370 g/L |
| Na <sub>2</sub> SO <sub>3</sub> (Sodium Sulfite) | 140 g/L    | 270 g/L  | 260 g/L  |
| NaHSO <sub>3</sub> (Sodium bisulfite)            | -          | 420 g/L  | -        |

**Table S1.** Absorbents and product solubility table for membrane contactor.

**Gas flow rates and liquid flow rates used to achieve L/G ratios of 1-5.**

**Table S2.** Feed gas and absorbent flow rates used to achieve different L/G ratios

| <b>L/G ratio</b> | <b>Gas flow rate<br/>(L/min)</b> | <b>Liquid flow rate<br/>(mL/min)</b> |
|------------------|----------------------------------|--------------------------------------|
| 1                | 16.6                             | 16.6                                 |
| 2                | 16.6                             | 33.2                                 |
| 3                | 16.6                             | 49.8                                 |
| 4                | 16.6                             | 66.4                                 |
| 5                | 16.6                             | 83                                   |

### **Effect of L/G ratio on pH change of liquid absorbent**

The pH of the absorbents were measured using a pH meter (Seven Compact S220, Mettler Toledo). For data reliability, the pH values were measured five times and the average values have been reported. The SO<sub>2</sub> is an acidic gas and when absorbed by the alkali absorbent, the pH value of the liquid absorbent should decrease. The pH values were measured when the absorbent achieved full saturation of SO<sub>2</sub> (SO<sub>2</sub> concentration in the outlet gas flow was constant). Assuming an ideal gas condition, with feed gas containing 1000 ppm of SO<sub>2</sub> and the L/G ratio is 1, the SO<sub>2</sub> flow rate reacting with the liquid absorbent is 0.016 L/min. Thus, 0.0065 moles of SO<sub>2</sub> react with the liquid absorbent per minute. Then, one mole of SO<sub>2</sub> molecule is ionized to SO<sub>4</sub><sup>2-</sup> and two protons (H<sup>+</sup>) are released, which are neutralized with two moles of base ion. The measured change in absorbent pH at different L/G ratios is presented in Fig. S1. It can be seen from the figure that the pH of DW was almost unchanged after SO<sub>2</sub> absorption, whereas the pH values for the aqueous NaOH and Na<sub>2</sub>SO<sub>3</sub> solutions slightly increased from 6.7 and 6.3 to 7.4 and 6.8, respectively. The reason for the increment in the pH value is that, with increase in the L/G ratio, the amount of the fresh liquid absorbent increased which, as a result, increased the pH of the absorbent.

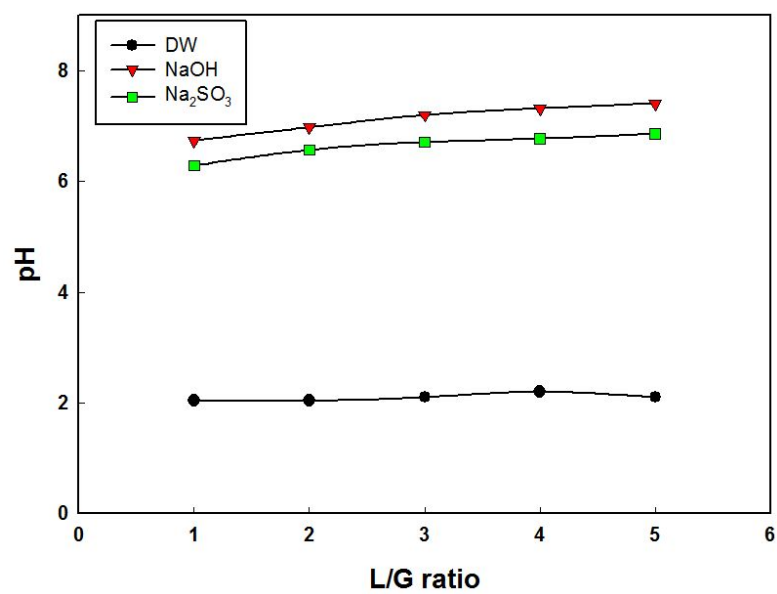

**Fig. S1.** pH change of liquid absorbent at different L/G ratios.

### Long-term stability test

The durability of a membrane is crucial for its commercial application. The durability of the membrane module used in this study was tested for 96 h and the SO<sub>2</sub> gas removal efficiency was recorded. The results are presented below in Fig. S2. It can be seen that the SO<sub>2</sub> removal was steady during the long-term stability test. A steady gas removal efficiency indicates that the membrane prevented wetting and no deterioration occurred.

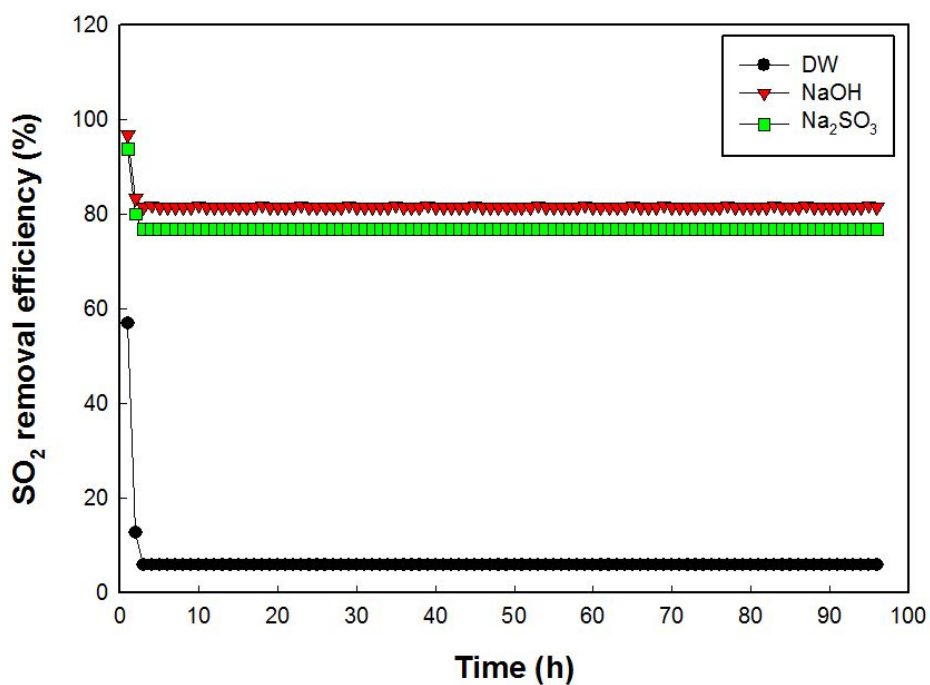

**Fig. S2.** Long-term stability test; SO<sub>2</sub> removal efficiency achieved by all three absorbents during the 96 h stability test.
